# Supplementary material
Source: HighWire-hosted journal article supplement (https://www.jneurosci.org/highwire/filestream/599162/field_highwire_adjunct_files/0/supplementary_table.pdf)
Supplement: supplementary_table.pdf [file supplementary_table.pdf]

| <i>Anatomical Label</i> |               | <i>SPACE</i> |          |          |                | <i>TIME</i> |          |          |                |      |
|-------------------------|---------------|--------------|----------|----------|----------------|-------------|----------|----------|----------------|------|
|                         |               | <i>x</i>     | <i>y</i> | <i>z</i> | <i>Z-score</i> | <i>x</i>    | <i>y</i> | <i>z</i> | <i>Z-score</i> |      |
| <b><i>Frontal</i></b>   |               |              |          |          |                |             |          |          |                |      |
| <i>dIPFC (MFG)</i>      | <i>L</i>      | 39           | 36       | 21       | 3.63           | 36          | 63       | -6       | 3.94           |      |
|                         | <i>R</i>      | -42          | 51       | 12       | 4.03           | -42         | 48       | 12       | 3.42           |      |
| <i>vIPFC (IFS)</i>      | <i>L</i>      | -33          | 27       | 21       | 3.39           |             |          |          |                |      |
| { <i>FEF</i>            | <i>R</i>      | 27           | 9        | 54       | 4.54           | 27          | 12       | 66       | 4.22           |      |
|                         | <i>L</i>      | -33          | -3       | 51       | 3.72           | -33         | 0        | 63       | 3.95           |      |
| { <i>vPMC</i>           | <i>R</i>      | 51           | 6        | 30       | 3.80           | 51          | 9        | 33       | 3.93           |      |
|                         | <i>L</i>      | -48          | 3        | 51       | 3.38           | -42         | 3        | 33       | 3.26           |      |
| <i>area 44</i>          | <i>R</i>      |              |          |          |                | 60          | 15       | 24       | 4.25           |      |
|                         | <i>L</i>      |              |          |          |                | -51         | 3        | 18       | 4.05           |      |
| <i>insula</i>           | <i>R</i>      | 33           | 24       | 0        | 5.08           | 33          | 24       | 3        | 4.51           |      |
|                         | <i>L</i>      | -33          | 15       | 6        | 3.59           | -36         | 18       | -3       | 3.13           |      |
| <i>preSMA</i>           |               | -6           | 15       | 48       | 4.31           | -3          | 24       | 45       | 4.13           |      |
| <b><i>Parietal</i></b>  |               |              |          |          |                |             |          |          |                |      |
| <i>IPS</i>              | { <i>aIPS</i> | <i>R</i>     | 48       | -48      | 51             | 5.34        | 48       | -48      | 51             | 4.57 |
|                         | { <i>IPL</i>  | <i>R</i>     | 54       | -30      | 48             | 3.96        | 39       | -42      | 45             | 4.46 |
|                         | { <i>SPL</i>  | <i>R</i>     | 12       | -69      | 54             | 4.33        | 18       | -63      | 63             | 4.59 |
|                         | { <i>aIPS</i> | <i>L</i>     | -33      | -51      | 48             | 5.71        | -33      | -51      | 48             | 5.17 |

|                           |                             |          |     |     |     |      |     |     |     |      |
|---------------------------|-----------------------------|----------|-----|-----|-----|------|-----|-----|-----|------|
| <i>IPS</i>                | <i>IPL</i>                  | <i>L</i> | -51 | -30 | -36 | 4.38 | -42 | -48 | 60  | 5.00 |
|                           | <i>SPL</i>                  | <i>L</i> | -21 | -63 | 63  | 4.83 | -24 | -60 | 63  | 5.01 |
|                           | <i>SI</i>                   | <i>L</i> | -42 | -27 | 60  | 4.30 |     |     |     |      |
| <hr/>                     |                             |          |     |     |     |      |     |     |     |      |
| <b><u>Occipital</u></b>   |                             |          |     |     |     |      |     |     |     |      |
|                           | <i>VI/V2</i>                | <i>R</i> | 30  | -96 | -3  | 4.61 | 24  | -96 | 9   | 4.86 |
|                           |                             | <i>L</i> | -27 | -96 | -6  | 4.07 | -27 | -90 | 6   | 2.86 |
|                           | <i>MT</i>                   | <i>R</i> | 45  | -63 | 6   | 4.14 | 48  | -60 | 6   | 3.50 |
|                           |                             | <i>L</i> | -45 | -69 | 9   | 4.00 | -51 | -72 | 6   | 3.96 |
| <hr/>                     |                             |          |     |     |     |      |     |     |     |      |
| <b><u>Cerebellum</u></b>  |                             |          |     |     |     |      |     |     |     |      |
|                           | <i>lobule VII (medial)</i>  | <i>R</i> |     |     |     |      | 9   | -81 | 27  | 4.10 |
|                           | <i>lobule VII (medial)</i>  | <i>L</i> |     |     |     |      | -12 | -73 | -30 | 4.05 |
|                           | <i>lobule VII (lateral)</i> | <i>L</i> |     |     |     |      | -33 | -66 | -45 | 4.04 |
|                           | <i>lobule VII (lateral)</i> | <i>R</i> |     |     |     |      | 36  | -75 | -30 | 3.14 |
|                           | <i>lobule VIII b</i>        | <i>R</i> |     |     |     |      | 15  | -57 | -54 | 3.53 |
|                           | <i>lobule VIII a</i>        | <i>R</i> |     |     |     |      | 30  | -48 | -51 | 3.37 |
| <hr/>                     |                             |          |     |     |     |      |     |     |     |      |
| <b><u>Subcortical</u></b> |                             |          |     |     |     |      |     |     |     |      |
|                           | <i>Globus pallidus</i>      | <i>L</i> | -24 | -9  | 3   | 3.25 |     |     |     |      |
|                           | <i>Globus pallidus</i>      | <i>R</i> | 21  | 0   | 12  | 2.96 |     |     |     |      |
|                           | <i>Thalamus</i>             | <i>L</i> | -9  | -21 | -6  | 3.85 |     |     |     |      |
|                           | <i>Thalamus</i>             | <i>R</i> | 18  | -9  | 12  | 3.79 |     |     |     |      |

**Supplementary Table 1.**

**Activity in the temporal-spatial prediction task and spatial prediction task compared to resting baseline.**

Thresholded at equivalent false discovery rate (FDR) 0.05; i.e.  $Z > 3.21$

In general, one set of coordinates (the peak voxel) is given for each cluster. In the case of very large activation we report sub-peaks in functionally distinct areas; these contiguous activations are bracketed together.
